# Supplementary material for: Highly crystalline K-intercalated Se/C: an easily accessible mesoporous material catalyzing the epoxidation of β-ionone
Source: Royal Society of Chemistry journal article supplement (doi:10.1039/d1cy02274a), 2022-01-01

**ESI for**

**Highly crystalline K-intercalated Se/C: An easily accessible mesoporous material catalyzing the epoxidation of  $\beta$ -ionone**

Peizi Li,<sup>a,b</sup> Zhengyuan Qi,<sup>c</sup> Lei Yu,<sup>\*a</sup> and Hongwei Zhou<sup>\*b</sup>

<sup>a</sup> School of Chemistry and Chemical Engineering, Yangzhou University, Yangzhou, Jiangsu 225002, P. R. China.

<sup>b</sup> College of Biological, Chemical and Engineering, Jiaying University, Jiaying, Zhejiang 314001, P. R. China.

<sup>c</sup> College of Information Science and Technology, Gansu Agricultural University, Lanzhou, Gansu 730070, P. R. China.

E-mail: yulei@yzu.edu.cn (L. Yu); zhouhw@zju.edu.cn (H. Zhou).

**CONTENTS**

|                                            |       |
|--------------------------------------------|-------|
| Details of tables.....                     | S2-3  |
| Details of quantitative calculations.....  | S4-S5 |
| Enlarged figures.....                      | S6    |
| NMR spectrum of the product <b>2</b> ..... | S7-S8 |

## Details of tables

**Table S1** Optimization of the reaction conditions of Se/C-catalyzed  $\beta$ -ionone epoxidation<sup>a</sup>

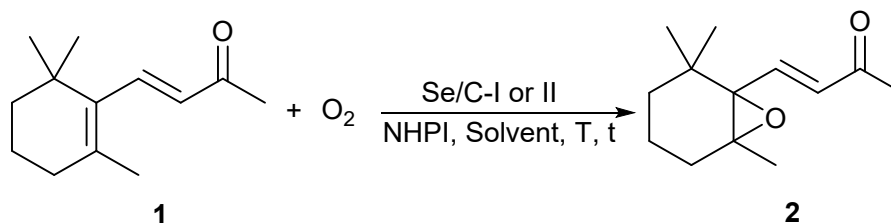

| Entry | Cat. | Solvent         | T<br>(°C) | t<br>(h) | Conversion<br>n<br>(%) | Selectivity<br>y<br>(%) | Yield<br>(%) <sup>c</sup> | TON<br>(mol/mol)     |
|-------|------|-----------------|-----------|----------|------------------------|-------------------------|---------------------------|----------------------|
| 1     | I    | MeCN            | 80        | 24       | 78                     | 45                      | 35                        | 6.31×10 <sup>3</sup> |
| 2     | II   | MeCN            | 80        | 24       | 58                     | 28                      | 16                        | 4.45×10 <sup>3</sup> |
| 3     | I    | EtOH            | 80        | 24       | 81                     | 32                      | 26                        | 4.69×10 <sup>3</sup> |
| 4     | I    | EtOAc           | 80        | 24       | 63                     | 27                      | 17                        | 3.07×10 <sup>3</sup> |
| 5     | I    | DMC             | 80        | 24       | 60                     | 33                      | 20                        | 3.61×10 <sup>3</sup> |
| 6     | I    | THF             | 80        | 24       | 55                     | 20                      | 11                        | 1.98×10 <sup>3</sup> |
| 7     | I    | 1,4-<br>dioxane | 80        | 24       | 94                     | 65                      | 61                        | 1.10×10 <sup>4</sup> |
| 8     | I    | 1,4-<br>dioxane | 60        | 24       | 56                     | 77                      | 43                        | 7.75×10 <sup>3</sup> |
| 9     | I    | 1,4-<br>dioxane | 100       | 24       | 99                     | 20                      | 20                        | 3.61×10 <sup>3</sup> |
| 10    | I    | 1,4-<br>dioxane | 80        | 12       | 59                     | 66                      | 39                        | 7.03×10 <sup>3</sup> |
| 11    | I    | 1,4-<br>dioxane | 80        | 36       | 99                     | 21                      | 21                        | 3.79×10 <sup>3</sup> |

<sup>a</sup> 1 mmol of **1**, 0.1 mmol of NHPI, 20 mg of catalyst, and 1 mL of solvent were employed. <sup>b</sup> Isolated yield of **2** based on **1**.

**Table S2** Control experiments for mechanism study<sup>a</sup>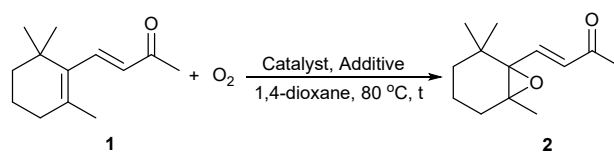

| Entry | Catalyst;<br>Additive <sup>b</sup>               | t<br>(h) | Conversion<br>(%) | Selectivity<br>(%) | Yield<br>(%) <sup>c</sup> | TON<br>(mol/mol)     |
|-------|--------------------------------------------------|----------|-------------------|--------------------|---------------------------|----------------------|
| 1     | Se/C-I (20 mg);<br>none                          | 24       | 64                | 63                 | 40                        | 7.21×10 <sup>3</sup> |
| 2     | Se/C-I (40 mg);<br>none                          | 24       | 66                | 49                 | 32                        | 5.77×10 <sup>3</sup> |
| 3     | Se/C-I (20 mg);<br>NHPI (10%)                    | 24       | 94                | 65                 | 61 <sup>d</sup>           | 1.10×10 <sup>4</sup> |
| 4     | None; NHPI<br>(10%)                              | 24       | 34                | 69                 | 23                        | -                    |
| 5     | None; NHPI<br>(20%)                              | 24       | 39                | 67                 | 26                        | -                    |
| 6     | KBr (5%), NHPI<br>(10%)                          | 24       | 22                | 78                 | 17                        | -                    |
| 7     | MgO (5%), NHPI<br>(10%)                          | 24       | 26                | 81                 | 21                        | -                    |
| 8     | Se/C-I (20 mg);<br>NHPI (10%) and<br>AIBN (100%) | 6        | 55                | 71                 | 39                        | 7.03×10 <sup>3</sup> |
| 9     | Se/C-I (20 mg);<br>NHPI (10%)                    | 12       | 59                | 66                 | 39 <sup>d</sup>           | 7.03×10 <sup>3</sup> |
| 10    | Se/C-I (20 mg);<br>NHPI (10%) and                | 24       | 23                | 69                 | 16                        | 2.89×10 <sup>3</sup> |

|    | TEMPO (100%)                   |    |    |    |    |                    |
|----|--------------------------------|----|----|----|----|--------------------|
| 11 | Se/C-II (20 mg);<br>NHPI (10%) | 24 | 42 | 52 | 22 | $6.12 \times 10^3$ |
| 12 | Se/C-II (40 mg);<br>NHPI (10%) | 24 | 56 | 45 | 25 | $3.48 \times 10^3$ |

<sup>a</sup> 1 mmol of **1**, 20 mg of Se/C-I (if used), and 1 mL of 1,4-dioxane were employed. <sup>b</sup> Weight amount of the catalyst or molar ratio of the additive vs. **1** was given inside the parentheses; <sup>c</sup> Isolated yield of **2** based on **1**; <sup>d</sup> Data in entries 3 and 9 in this table were from the Table S1, entries 7 and 10 respectively.

### Details of quantitative calculations

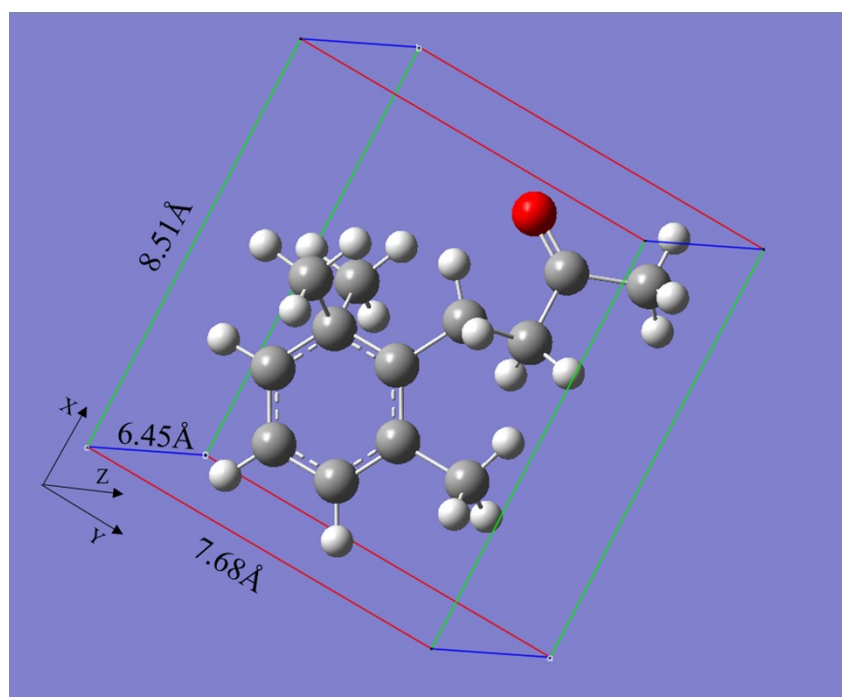

**Fig. S1** Space structure of  $\beta$ -ionone.

The calculation process of maximum length of cuboid that can hold  $\beta$ -ionone molecule (The length, width and height values of the cuboid are all from GaussView 5 software using density functional theory (DFT) at B3PW91/6-311G level):

$$X_1 = 8.51 \text{ \AA}$$

$$Y_1 = 7.68 \text{ \AA}$$

$$Z_1 = 6.45 \text{ \AA}$$

$$L_{1 \text{ max}} = \sqrt{(X_1^2 + Y_1^2 + Z_1^2)} = 13.15 \text{ \AA} = 1.32 \text{ nm} < 3.2 \text{ nm}$$

Thus,  $\beta$ -ionone molecule can enter the catalyst pores freely.

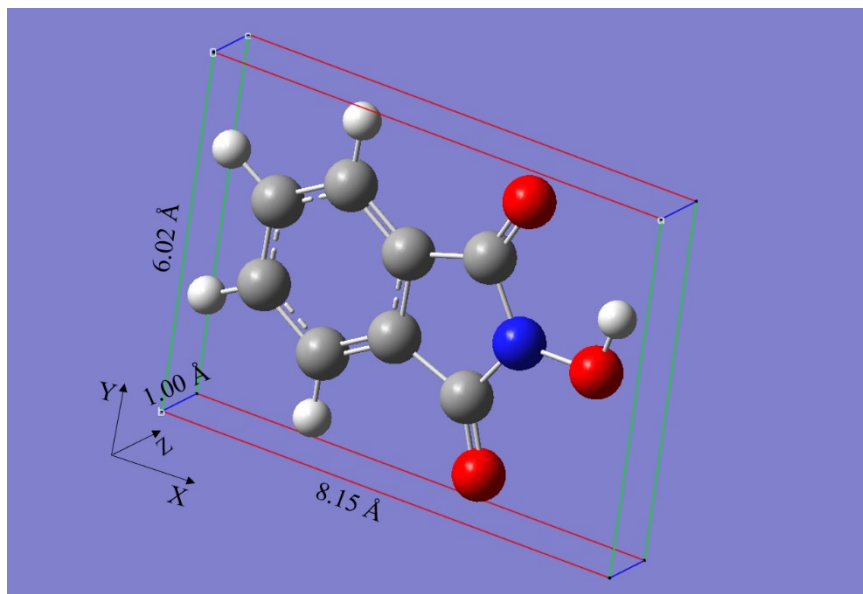

**Fig. S2** Space structure of NHPI.

The calculation process of maximum length of cuboid that can hold NHPI molecule (The length, width and height values of the cuboid are all from GaussView 5 software using density functional theory (DFT) at B3PW91/6-31G level):

$$X_2 = 8.15 \text{ \AA}$$

$$Y_2 = 6.02 \text{ \AA}$$

$$Z_2 = 1.00 \text{ \AA}$$

$$L_{2 \max} = \sqrt{(X_2^2 + Y_2^2 + Z_2^2)} = 10.18 \text{ \AA} = 1.02 \text{ nm} < 3.2 \text{ nm}$$

Thus, NHPI molecule can also enter the catalyst pores freely.

## Enlarged figures

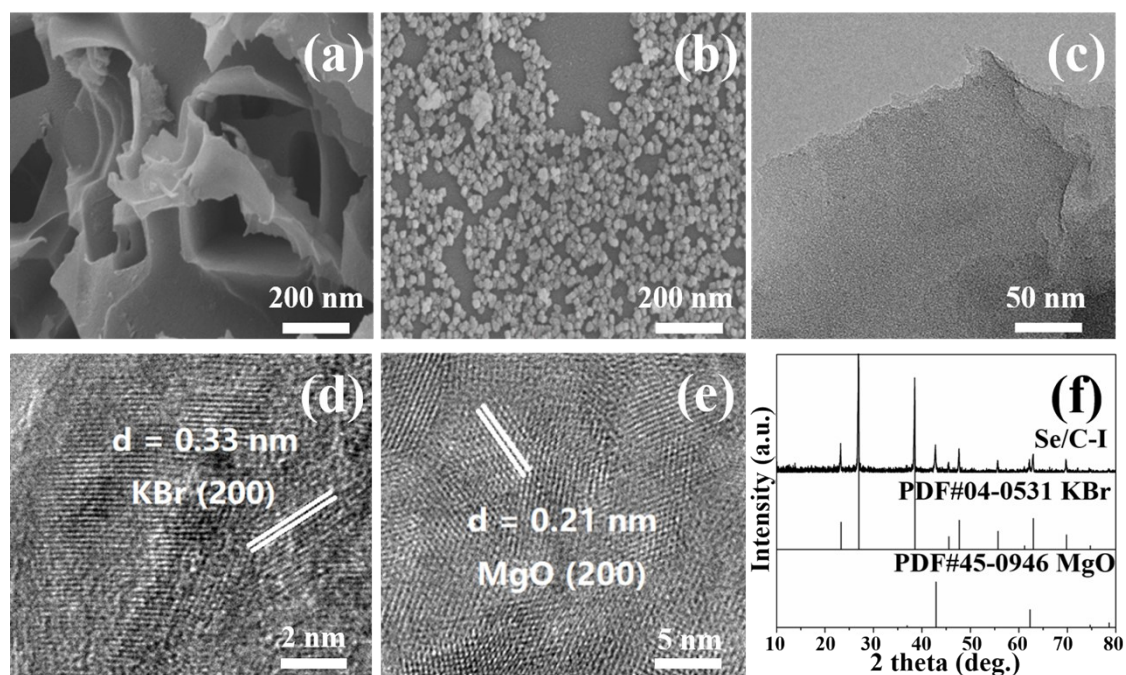

**Fig. S3 (Fig. 1 in text)** Characterization of the materials (a) SEM image of Se/C-I; (b) SEM image of Se/C-II; (c) TEM image of Se/C-I; (d,e) HRTEM images of Se/C-I; (f) XRD pattern of Se/C-I.

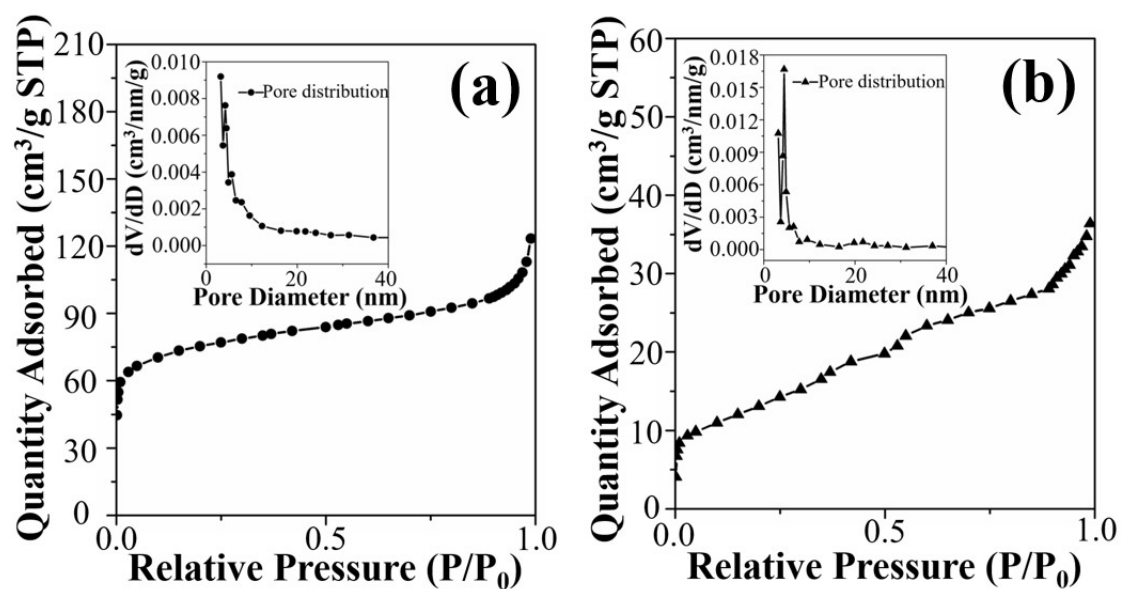

**Fig. S4 (Fig. 4 in text)** Nitrogen adsorption-desorption isotherms of Se/C-I and II.

## NMR spectrum of the product 2

2,  $^1\text{H}$  NMR,  $\text{CDCl}_3$ , 400 MHz

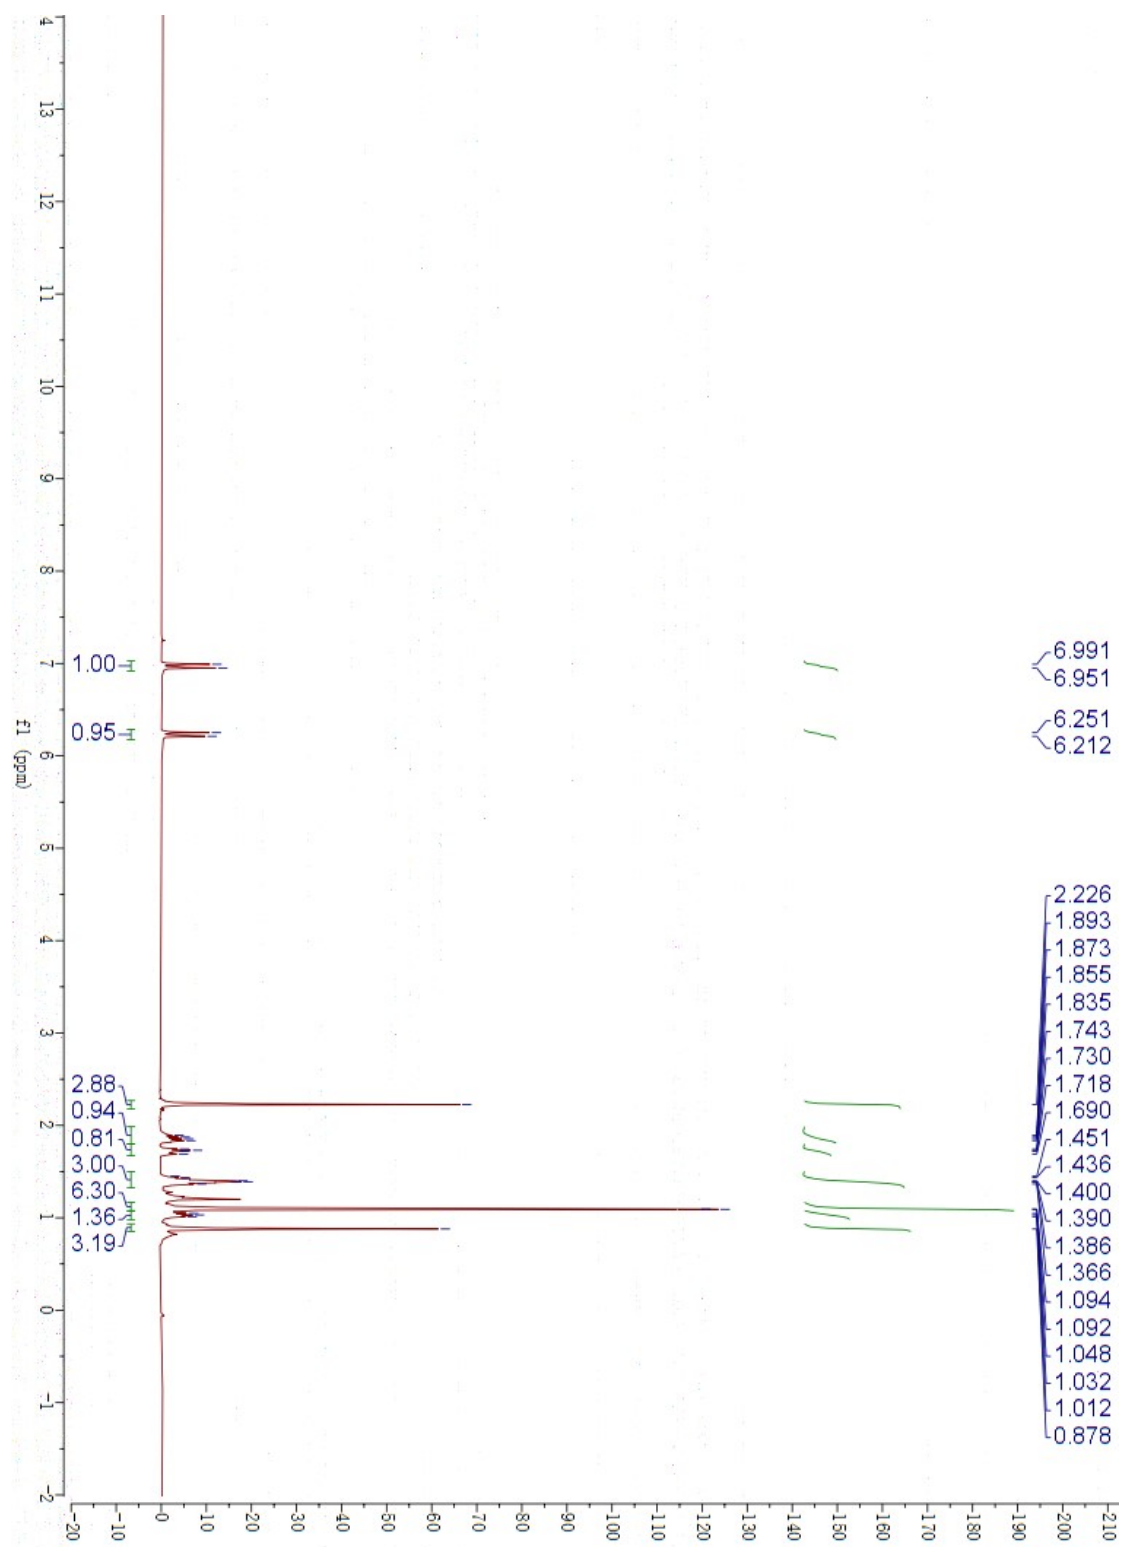

2, <sup>13</sup>C NMR, CDCl<sub>3</sub>, 100 MHz

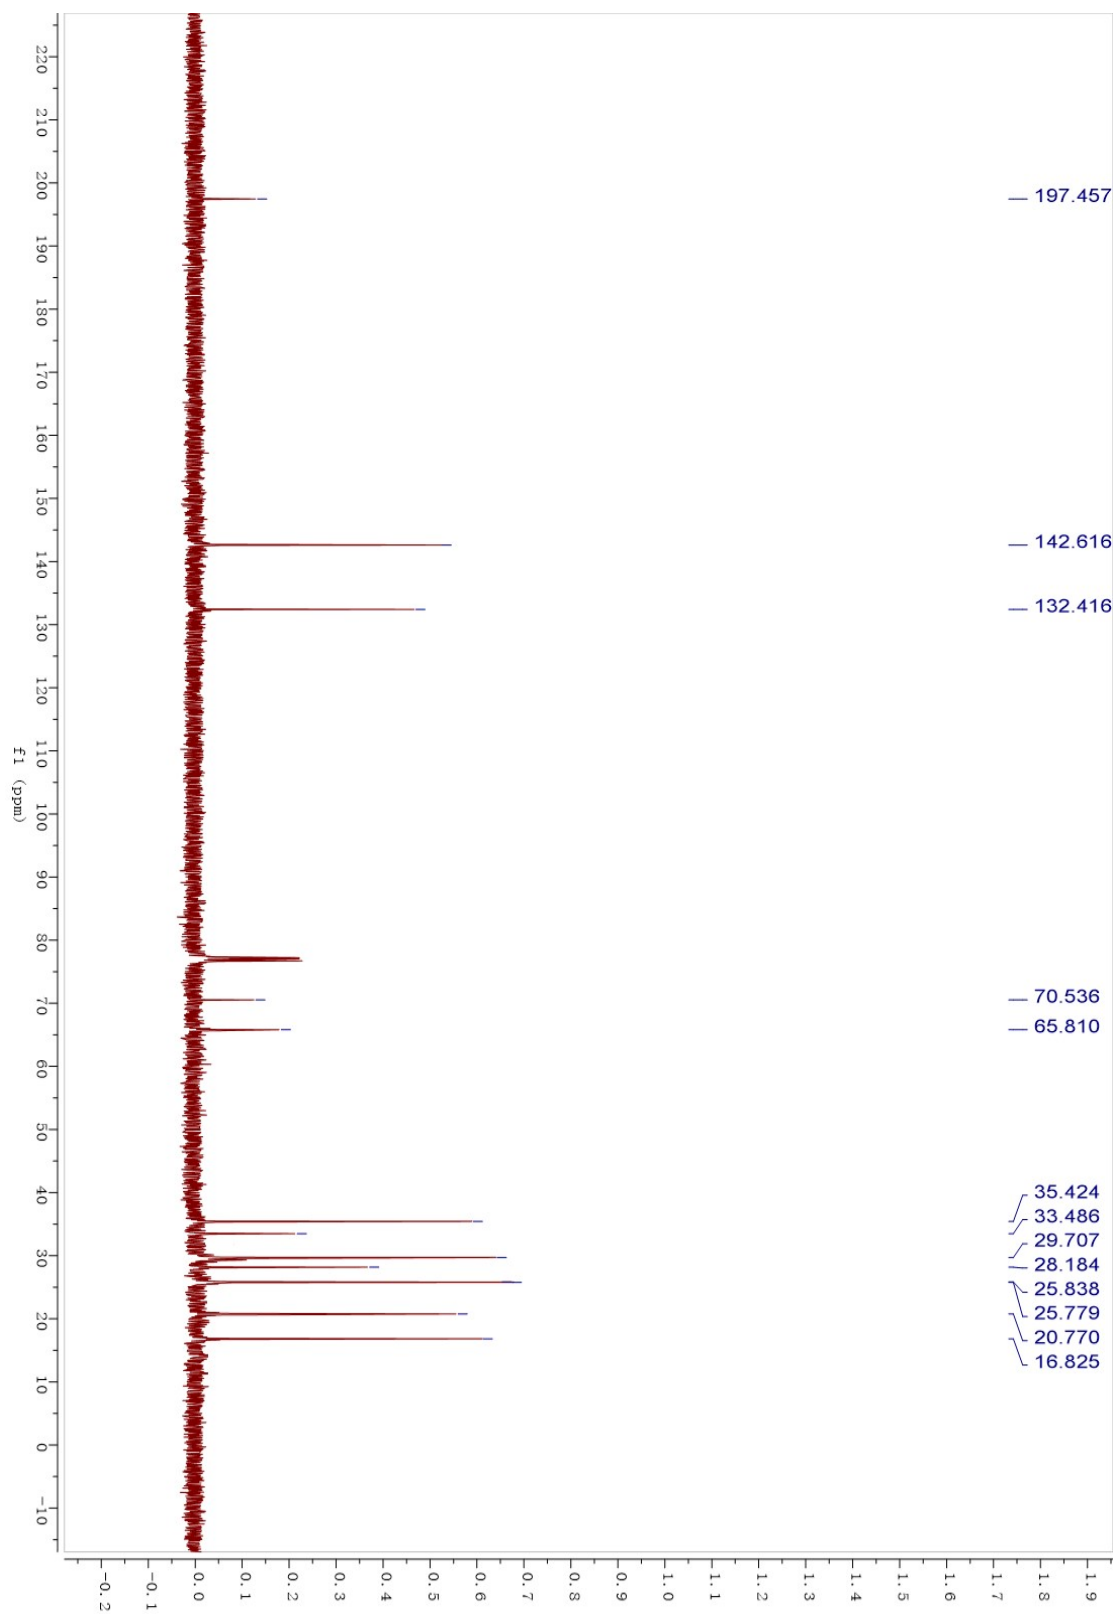

Supplement: d1cy02274a1.pdf [file d1cy02274a1.pdf]
